# Supplementary material
Source: PubMed Central journal article supplement (PMC6879281)
Supplement: JCM.00997-19-s0001.pdf [file JCM.00997-19-s0001.pdf]

1 Supplementary table 1. Number of samples with discrepant Onclarity and Cobas hrHPV  
2 results.

|                                    | Aptima positive | Total |
|------------------------------------|-----------------|-------|
| Onclarity positive, Cobas negative | 7               | 14    |
| Onclarity negative, Cobas positive | 5               | 26    |
| Total                              | 12              | 40    |

3

4 Supplementary table 2. Several genotype combination of interest

| HPV genotype                                       | Number of CIN2/3+ | Number of sample with the genotype | Relative risk to CIN2/3+ (95% CI)* |
|----------------------------------------------------|-------------------|------------------------------------|------------------------------------|
| hrHPV +ve, 16 +ve or -ve, 33/58 -ve, 56/59/66 +ve  | 8                 | 59                                 | 4.32 (1.55-12.01)                  |
| hrHPV +ve, 16 +ve, 33/58 -ve, 56/59/66 -ve, 52 +ve | 4                 | 9                                  | 11.13 (3.58-34.61)                 |
| hrHPV +ve, 16 -ve, 33/58 +ve, 52 +ve               | 8                 | 15                                 | 12.58 (4.78-33.10)                 |

5 \*: Risk relative to hrHPV negative as presented in Table 5.
